# Supplementary material
Source: Springer Nature journal article supplement (https://www.springermedizin.de/resource/supplementary/13046_2010_295_MOESM2_ESM.pdf/9662058)

a

## Autologous T cell proliferation

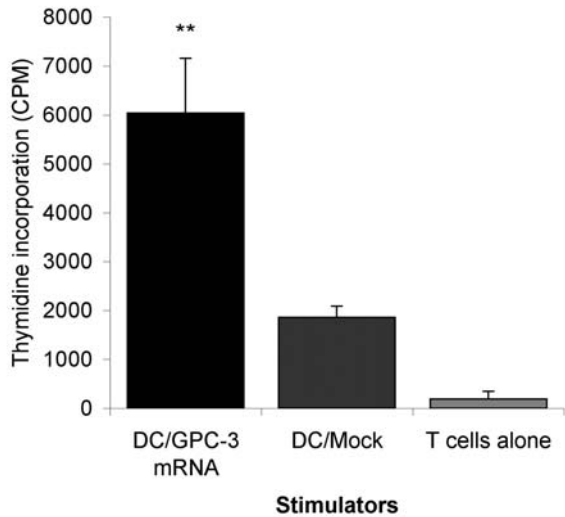

b

Autologous T cell interferon- $\gamma$  production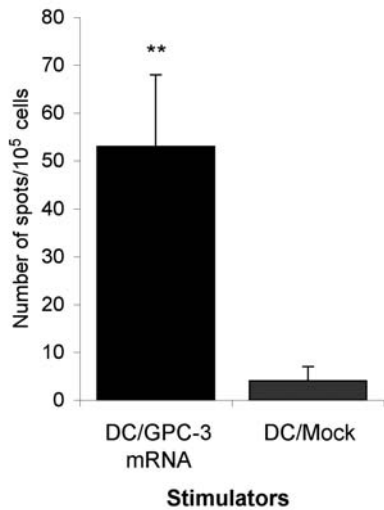

Supplement: MOESM2 [file 9662058]
